# Supplementary material for: A supramolecular cascade assembly with a two-step sequential energy transfer process for enhanced photocatalytic performance
Source: Royal Society of Chemistry journal article supplement (doi:10.1039/d4ta01817f), 2024-01-01
Supplement: d4ta01817f1.pdf [file d4ta01817f1.pdf]

Electronic Supplementary Information for

**A supramolecular cascade assembly with a two-step sequential energy transfer process for enhanced photocatalytic performance**

Guang-Lu Li, Kai-Kai Niu, Xuan-Zong Yang, Hui Liu, Shengsheng Yu\* and Ling-Bao Xing\*

School of Chemistry and Chemical Engineering, Shandong University of Technology, Zibo 255000,  
Shandong Province, P. R. China

\*Corresponding author: Tel./fax: +86 533 2781664. E-mail: ssyu@sdut.edu.cn; lbxing@sdut.edu.cn.

## Experimental

Materials: Unless specifically mentioned, all chemicals are commercially available and were used as received.

### Characterizations

$^1\text{H}$  NMR and  $^{13}\text{C}$  NMR spectra were recorded on a Bruker Avance 400 spectrometer (400 MHz) at 298 K, and the chemical shifts ( $\delta$ ) were expressed in ppm, and  $J$  values were given in Hz. UV-vis spectra were obtained on a Shimadzu UV-1601PC spectrophotometer in a quartz cell (light path 10 mm) at 298 K. Steady-state fluorescence measurements were carried out using the FLS5 Steady-State/Transient Fluorescence Spectrometer. Dynamic light scattering (DLS) and zeta potential are measured on Malvern Zetasizer Nano ZS90. Transmission electron microscopy (TEM) images were obtained on a JEM 2100 operating at 120 kV. Samples for TEM measurement was prepared by dropping the mixed aqueous solution on a carbon-coated copper grid (300 mesh) and drying by slow evaporation. Hamamatsu absolute quantum yield measuring instrument Quantaury-QY was used to obtain fluorescence quantum yields. The time-resolved fluorescence decay curve was obtained by the FLS5 Steady-State/Transient Fluorescence Spectrometer. Photoluminescence spectra was recorded by FLS5 equipped.

### Energy-transfer efficiency calculation

The energy-transfer efficiency ( $\Phi_{\text{ET}}$ ) was calculated from excitation fluorescence spectra through the equation S1:

$$\Phi_{\text{ET}} = 1 - I_{\text{DA}}/I_{\text{D}} \quad (\text{S1})$$

Where  $I_{\text{DA}}$  and  $I_{\text{D}}$  are the fluorescence intensities of the emission of PATT-CB[7]-SBE- $\beta$ -CD+EY or PATT-CB[7]-SBE- $\beta$ -CD+EY+SR101 (acceptor), and PATT-CB[7]-SBE- $\beta$ -CD or PATT-CB[7]-SBE- $\beta$ -CD+EY (donor) respectively, when excited at 313 nm. The energy-transfer efficiency ( $\Phi_{\text{ET}}$ ) was calculated as 14% and 20% in an aqueous environment, measured under the condition of [PATT] =  $1.0 \times 10^{-5}$  mol/L, CB[7] =  $4.0 \times 10^{-5}$  mol/L, [SBE- $\beta$ -CD] =  $1.6 \times 10^{-5}$  mol/L, EY =  $7.5 \times 10^{-7}$  mol/L, SR101 =  $1.1 \times 10^{-6}$  mol/L.

### Antenna effect calculation

The Antenna effect was calculated based on the excitation spectra using equation S2:

$$\text{Antenna effect} = (I_{\text{DA},313} - I_{\text{D},313}) / I_{\text{DA},516/580} \quad (\text{S2})$$

Where  $I_{\text{DA}}$  and  $I_{\text{D}}$  are the fluorescence intensities of the emission of PATT-CB[7]-SBE- $\beta$ -CD+EY,

or PATT-CB[7]-SBE- $\beta$ -CD+EY+SR101 (acceptor) and PATT-CB[7]-SBE- $\beta$ -CD or PATT-CB[7]-SBE- $\beta$ -CD+EY (donor) respectively, when excited at 313 nm. The antenna effect value was calculated as 10.3 and 11.4 in water, measured under the condition of [PATT] =  $1.0 \times 10^{-5}$  mol/L, CB[7] =  $4.0 \times 10^{-5}$  mol/L, [SBE- $\beta$ -CD] =  $1.6 \times 10^{-5}$  mol/L, EY =  $7.5 \times 10^{-7}$  mol/L, SR101 =  $1.1 \times 10^{-6}$  mol/L.

**General procedure for the aerobic oxidation reaction of *N*-phenyltetrahydroisoquinoline:**

The *N*-phenyltetrahydroisoquinoline or its derivatives (0.20 mmol) was added in the newly produced solution of PATT-CB[7]-SBE- $\beta$ -CD+EY+SR101 (0.6 mol%). The mixture was irradiated with 360-365 nm LED (10 W) at room temperature for 36 h. Then, the mixture was extracted with dichloromethane and dried with anhydrous Na<sub>2</sub>SO<sub>4</sub>. The organic solution was concentrated in a vacuum and purified by rapid column chromatography to obtain the corresponding products.

**General procedure for photooxidation reactions of benzylamine:**

The benzylamine (0.20 mmol) was added in the newly produced solution of PATT-CB[7]-SBE- $\beta$ -CD+EY+SR101 (1 mol%). The mixture was irradiated with 360-365 nm LED (10 W) at room temperature for 24 h. Then, the mixture was extracted with ethyl acetate and dried with anhydrous Na<sub>2</sub>SO<sub>4</sub>. The organic solution was concentrated in a vacuum and purified by rapid column chromatography to obtain the corresponding products.

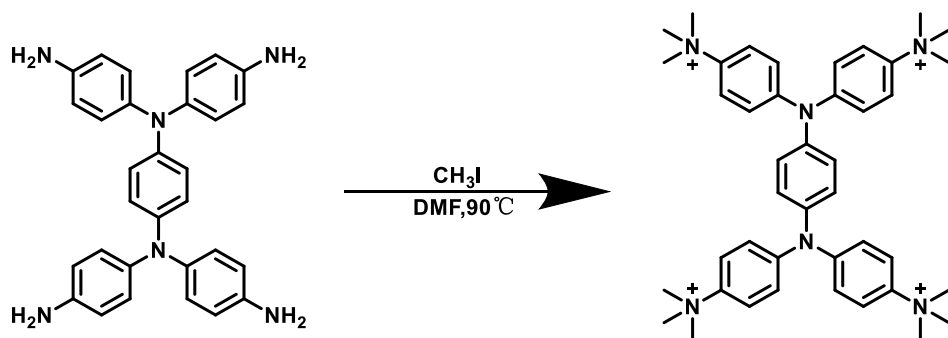

**Scheme S1** Synthetic route of PATT.

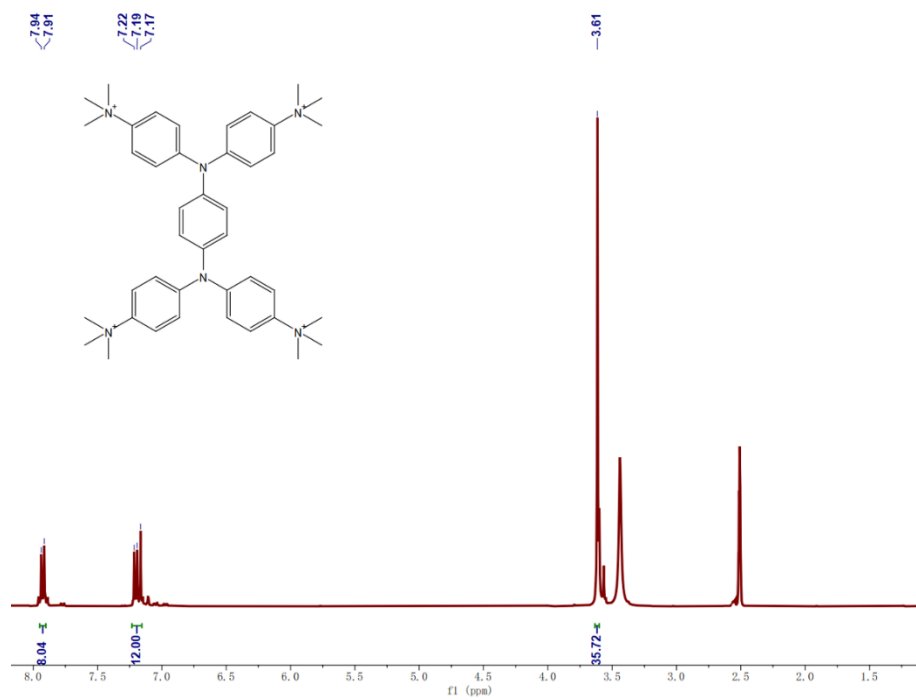

**Fig. S1**  $^1\text{H}$  NMR spectra of PATT in  $\text{DMSO-}d_6$ .

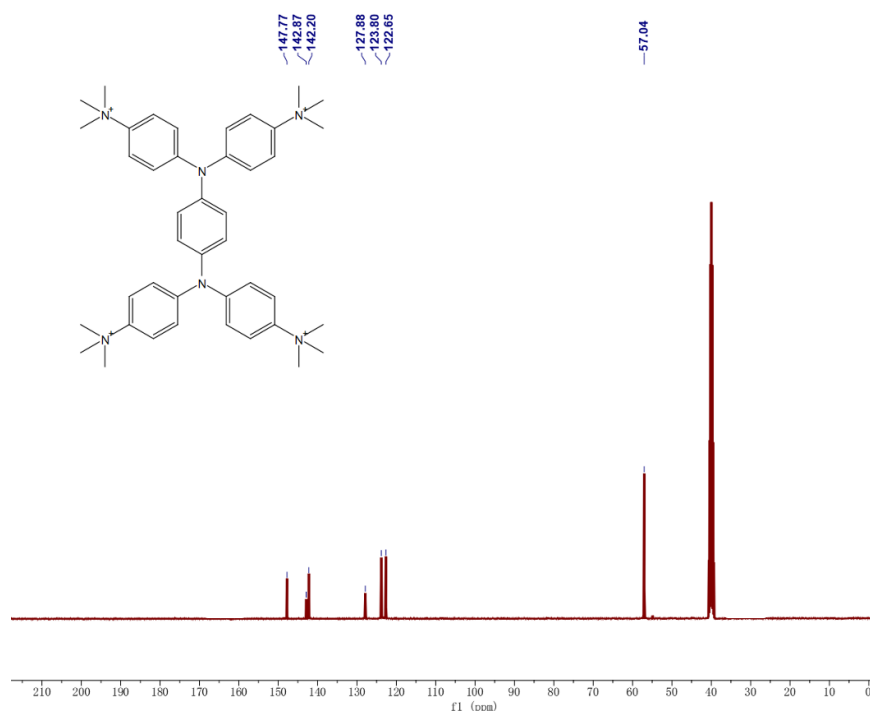

**Fig. S2**  $^{13}\text{C}$  NMR spectra of PATT in  $\text{DMSO-}d_6$ .

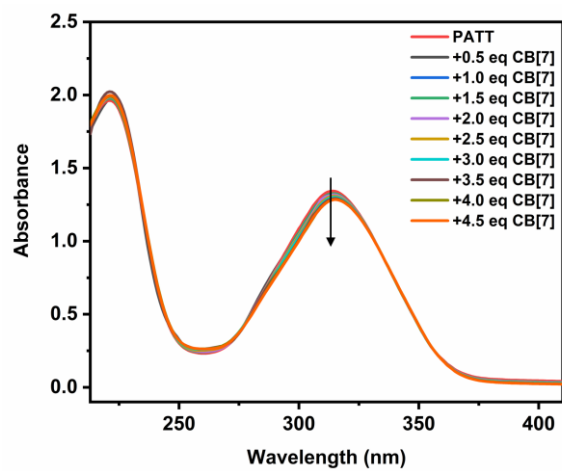

**Fig. S3** UV-vis absorption spectra of PATT with the addition of CB[7] ( $[PATT] = 1.0 \times 10^{-5}$  mol/L,  $CB[7] = 4.0 \times 10^{-5}$  mol/L).

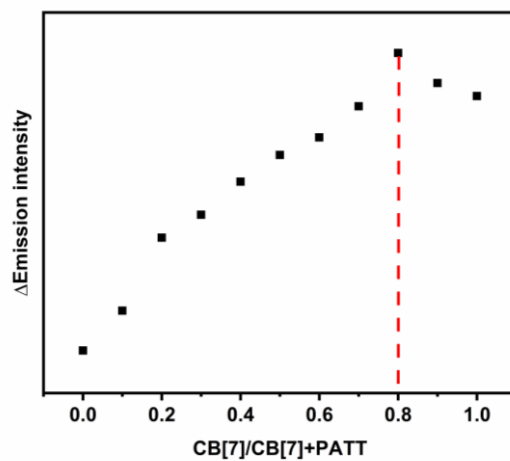

**Fig. S4** The Job's plot of PATT and CB[7] system in the aqueous solution.



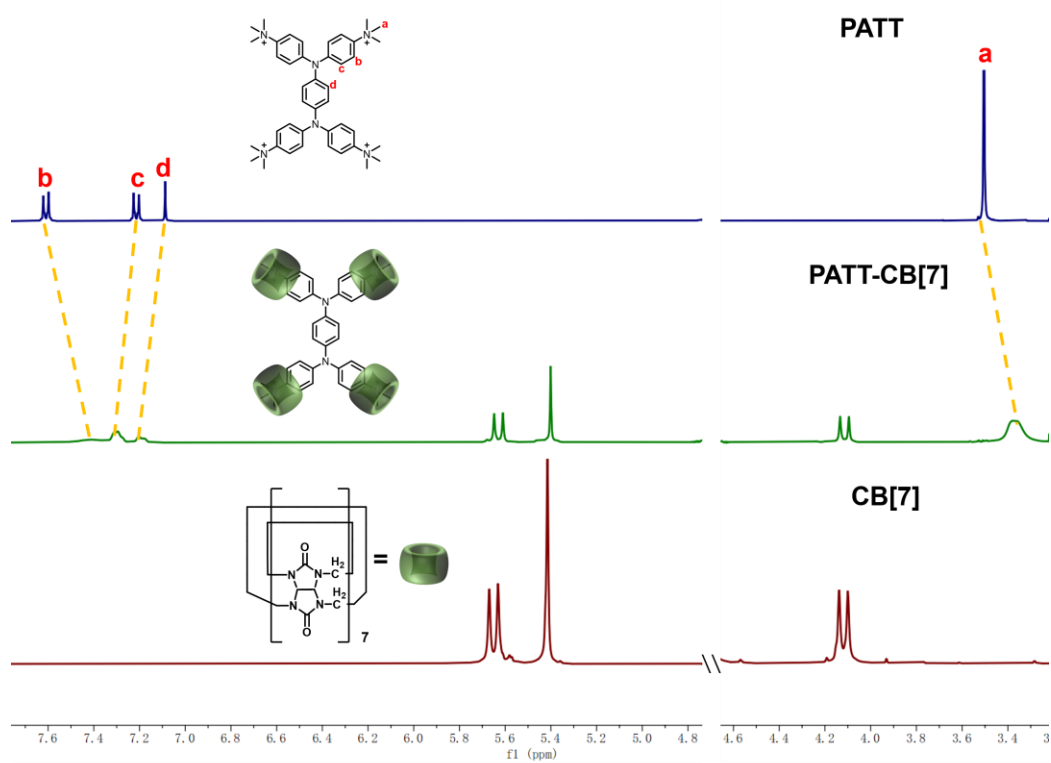

**Fig. S5**  $^1\text{H}$  NMR spectra of PATT in the presence of 4.0 equiv. CB[7] in  $\text{D}_2\text{O}$  ( $[\text{PATT}] = 1.0 \times 10^{-5}$  mol/L,  $[\text{CB}[7]] = 4.0 \times 10^{-5}$  mol/L,  $[\text{PATT}] + [\text{CB}[7]] = 1.0 \times 10^{-5}$  M).

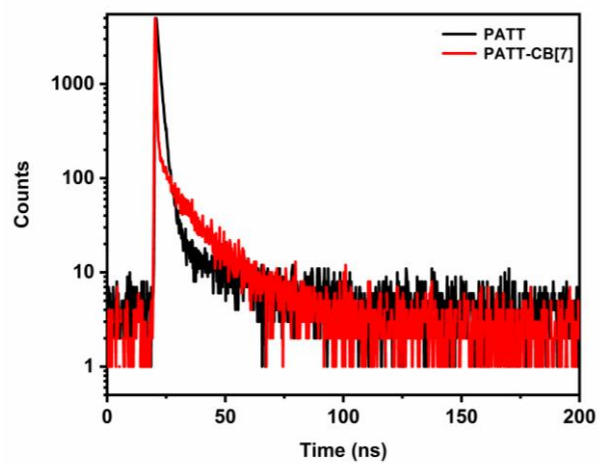

**Fig. S6** Time-resolved fluorescence decay curves of PATT and PATT-CB[7] ( $[PATT] = 1.0 \times 10^{-5}$  mol/L,  $CB[7] = 4.0 \times 10^{-5}$  mol/L).

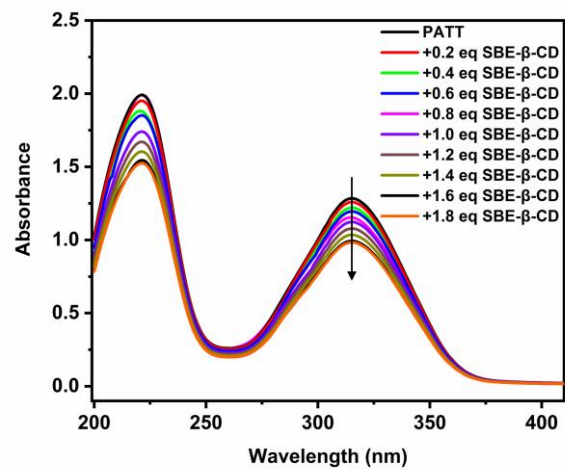

**Fig. S7** UV-vis absorption spectra of PATT-CB[7] with the addition of SBE-β-CD ( $[PATT] = 1.0 \times 10^{-5}$  mol/L,  $CB[7] = 4.0 \times 10^{-5}$  mol/L,  $[SBE-\beta-CD] = 1.6 \times 10^{-5}$  mol/L).

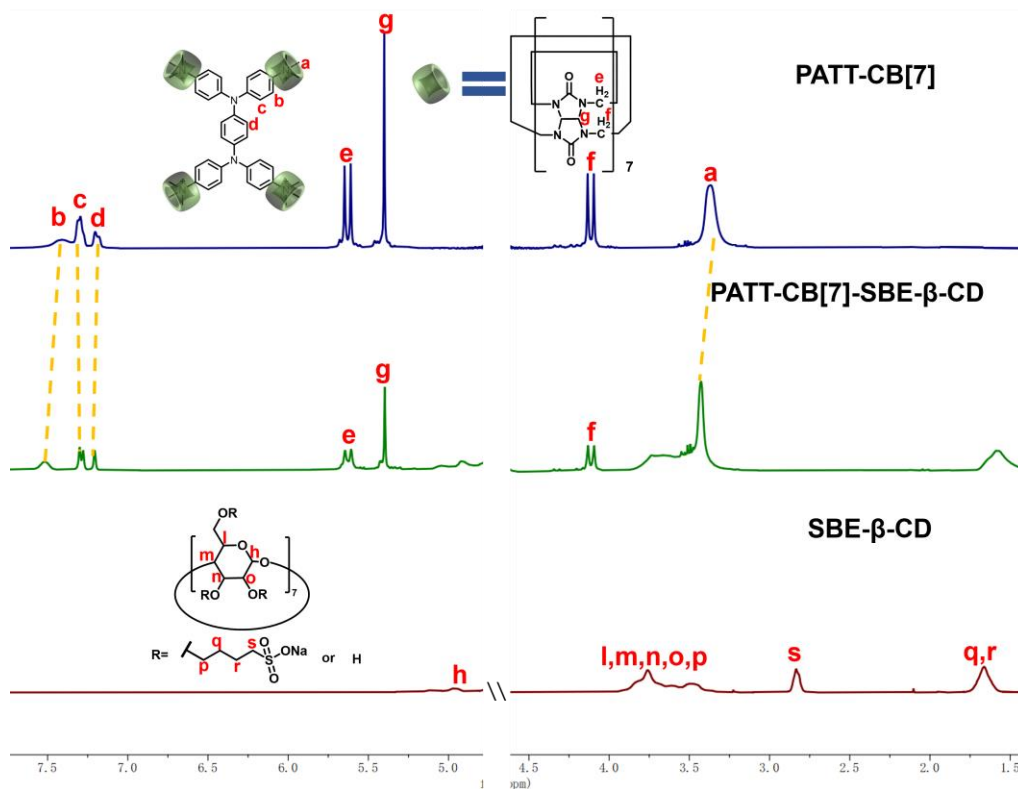

**Fig. S8** <sup>1</sup>H NMR spectra of PATT-CB[7] in the presence of 1.6 equiv. SBE-β-CD in D<sub>2</sub>O ([PATT] =  $1.0 \times 10^{-5}$  mol/L, CB[7] =  $4.0 \times 10^{-5}$  mol/L, [SBE-β-CD] =  $1.6 \times 10^{-5}$  mol/L).

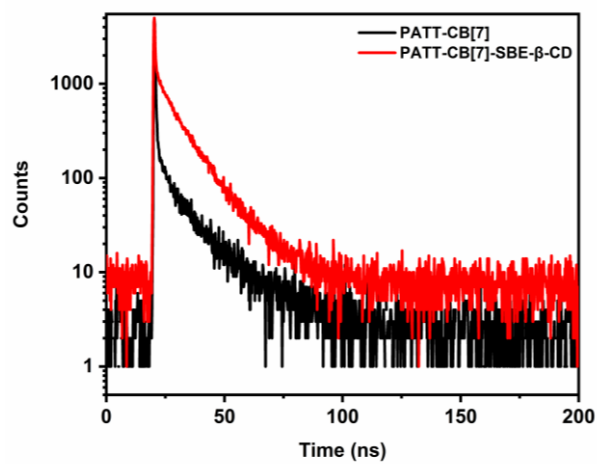

**Fig. S9** Time-resolved fluorescence decay curves of PATT-CB[7] and PATT-CB[7]-SBE- $\beta$ -CD ([PATT] =  $1.0 \times 10^{-5}$  mol/L, CB[7] =  $4.0 \times 10^{-5}$  mol/L, [SBE- $\beta$ -CD] =  $1.6 \times 10^{-5}$  mol/L).

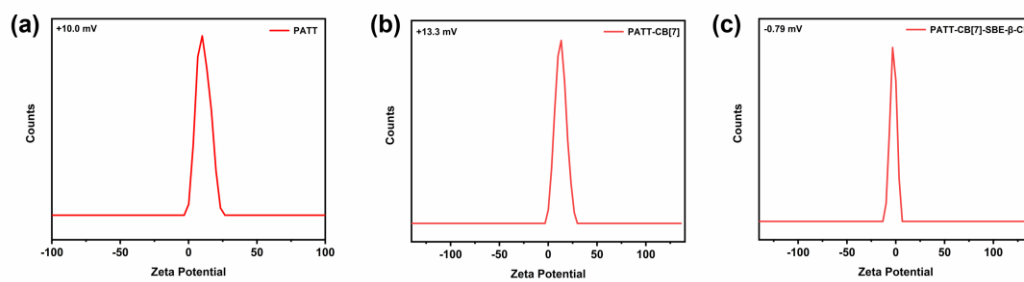

**Fig. S10** Zeta potential of (a) PATT, (b) PATT-CB[7], and (c) PATT-CB[7]-SBE- $\beta$ -CD ([PATT] =  $1.0 \times 10^{-5}$  mol/L, CB[7] =  $4.0 \times 10^{-5}$  mol/L, [SBE- $\beta$ -CD] =  $1.6 \times 10^{-5}$  mol/L).

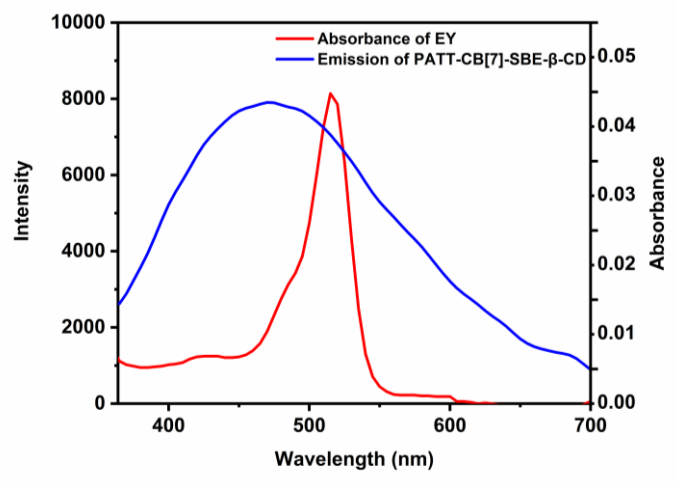

**Fig. S11** Fluorescence emission spectra of PATT-CB[7]-SBE- $\beta$ -CD and UV-vis absorption spectra of EY.

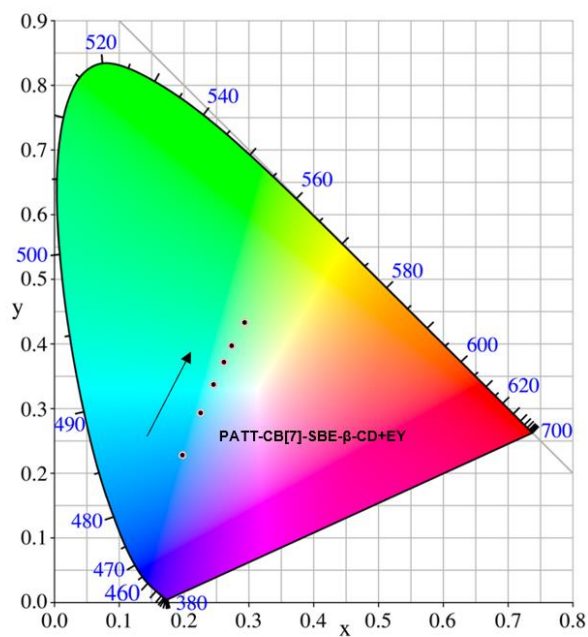

**Fig. S12** CIE chromaticity coordinates of PATT-CB[7]-SBE- $\beta$ -CD at different concentrations of EY (from 0 to 0.05 equiv.) ( $[PATT] = 1.0 \times 10^{-5}$  mol/L,  $[CB[7]] = 4.0 \times 10^{-5}$  mol/L,  $[SBE-\beta-CD] = 1.6 \times 10^{-5}$  mol/L).



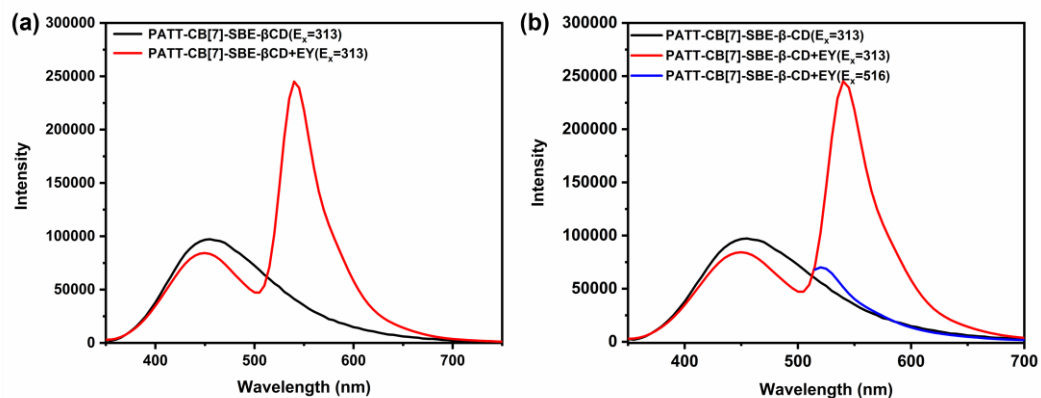

**Fig. S13** (a) Fluorescence emission spectra of PATT-CB[7]-SBE- $\beta$ -CD and PATT-CB[7]-SBE- $\beta$ -CD+EY; (b) Fluorescence emission spectra of PATT-CB[7]-SBE- $\beta$ -CD +EY (the red line), PATT-CB[7]-SBE- $\beta$ -CD+EY (the blue line), PATT-CB[7]-SBE- $\beta$ -CD (the black line) ([PATT] =  $1.0 \times 10^{-5}$  mol/L, CB[7] =  $4.0 \times 10^{-5}$  mol/L, [SBE- $\beta$ -CD] =  $1.6 \times 10^{-5}$  mol/L, EY =  $5.0 \times 10^{-7}$  mol/L).

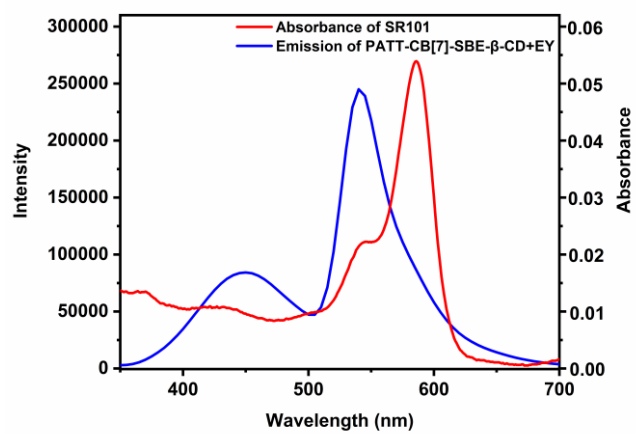

**Fig. S14** Fluorescence emission spectra of PATT-CB[7]-SBE-β-CD+EY and UV-vis absorption spectra of SR101.

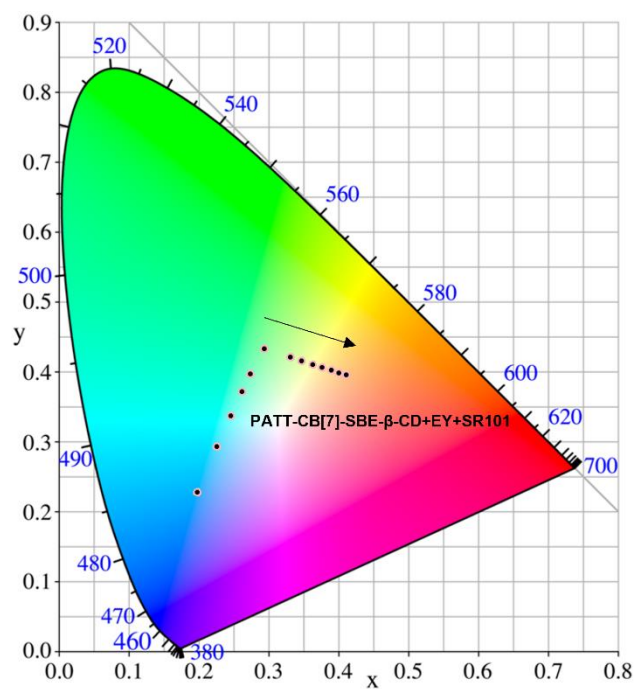

**Fig. S15** CIE chromaticity coordinates of PATT-CB[7]-SBE-β-CD+EY at different concentrations of SR101 (from 0 to 0.07 equiv.) ( $[PATT] = 1.0 \times 10^{-5}$  mol/L,  $[CB[7]] = 4.0 \times 10^{-5}$  mol/L,  $[SBE-\beta-CD] = 1.6 \times 10^{-5}$  mol/L,  $EY = 5.0 \times 10^{-7}$  mol/L).

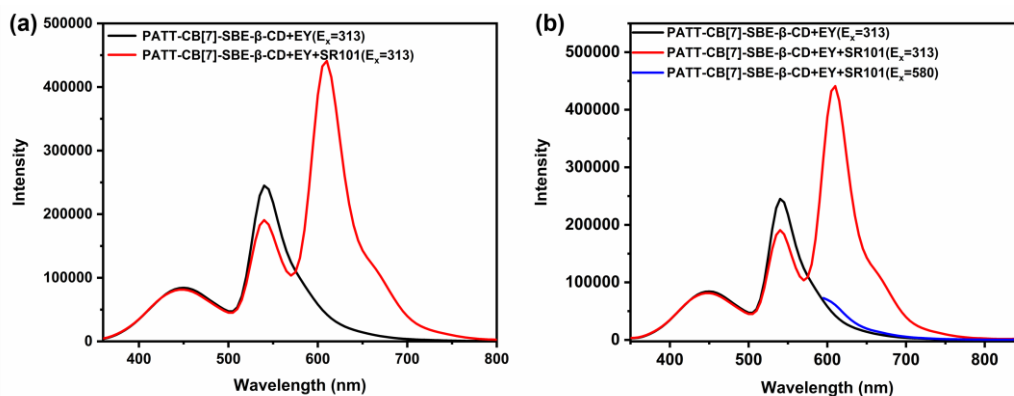

**Fig. S16** (a) Fluorescence emission spectra of PATT-CB[7]-SBE-β-CD+EY and D PATT-CB[7]-SBE-β-CD+EY+SR101; (b) Fluorescence emission spectra of PATT-CB[7]-SBE-β-CD+EY+SR101 (the red line), PATT-CB[7]-SBE-β-CD+EY+SR101 (the blue line), PATT-CB[7]-SBE-β-CD+EY (the black line) ( $[PATT] = 1.0 \times 10^{-5}$  mol/L,  $[CB[7]] = 4.0 \times 10^{-5}$  mol/L,  $[SBE-\beta-CD] = 1.6 \times 10^{-5}$  mol/L,  $EY = 5.0 \times 10^{-7}$  mol/L,  $SR101 = 7.0 \times 10^{-7}$  mol/L).

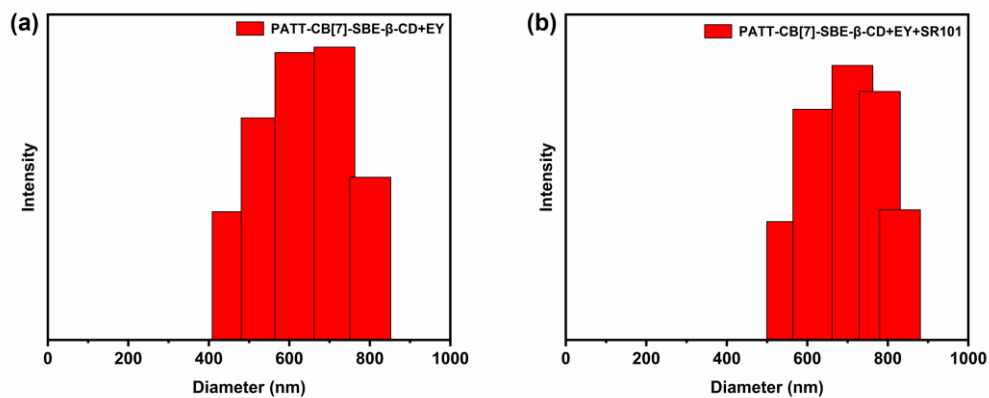

**Fig. S17** DLS of (a) PATT-CB[7]-SBE-β-CD+EY and (b) PATT-CB[7]-SBE-β-CD+EY+SR101 ([PATT] =  $1.0 \times 10^{-5}$  mol/L, CB[7] =  $4.0 \times 10^{-5}$  mol/L, [SBE-β-CD] =  $1.6 \times 10^{-5}$  mol/L, EY =  $5.0 \times 10^{-7}$  mol/L, SR101 =  $7.0 \times 10^{-7}$  mol/L).

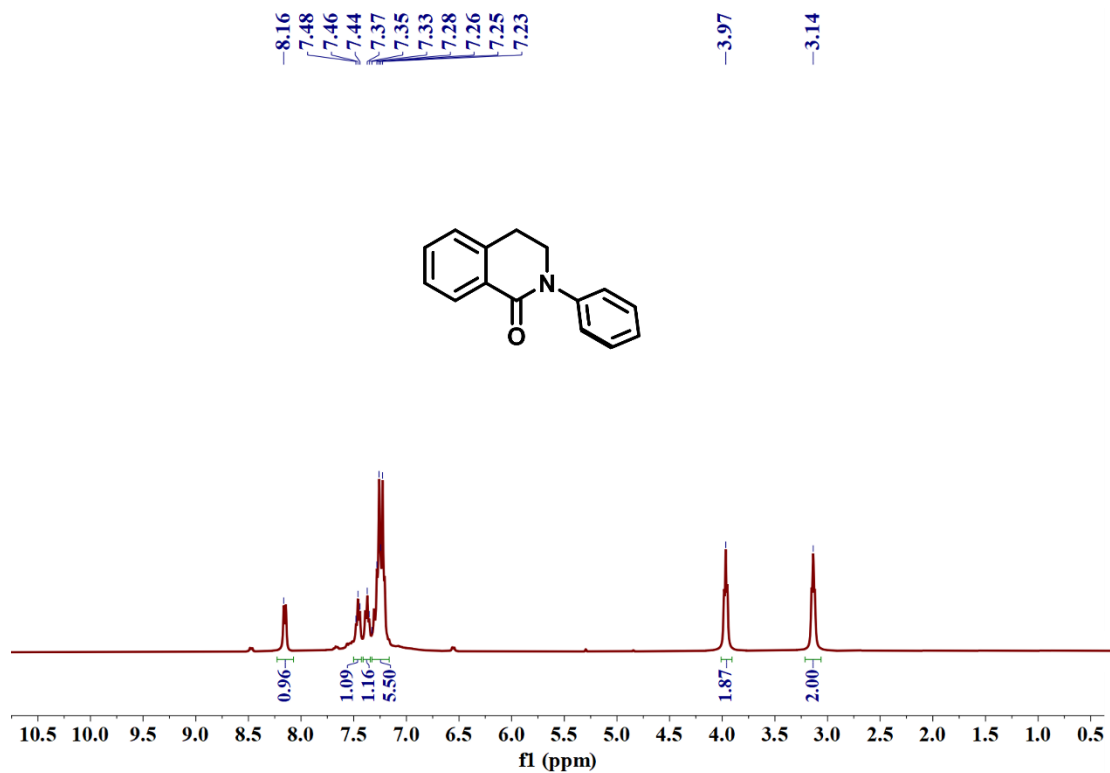

Fig. S18 <sup>1</sup>H NMR spectra of **2a** in CDCl<sub>3</sub>.

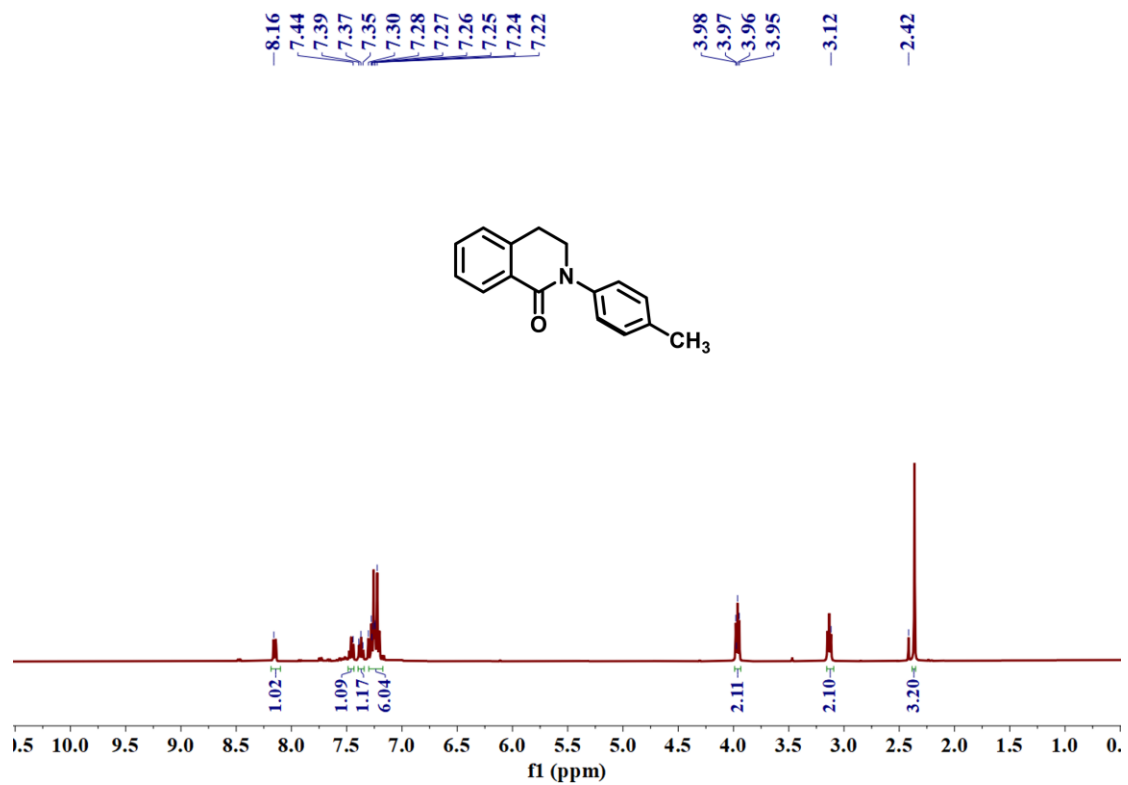

Fig. S19 <sup>1</sup>H NMR spectra of **2b** in CDCl<sub>3</sub>.

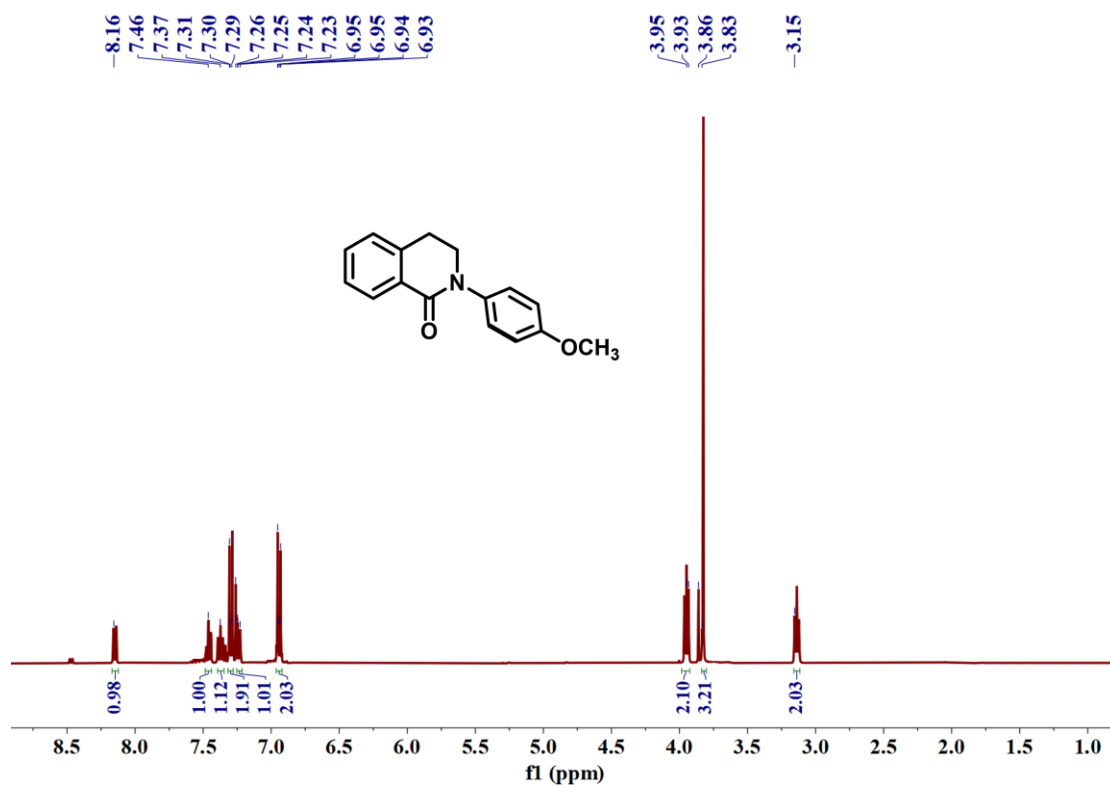

Fig. S20 <sup>1</sup>H NMR spectra of 2c in CDCl<sub>3</sub>.



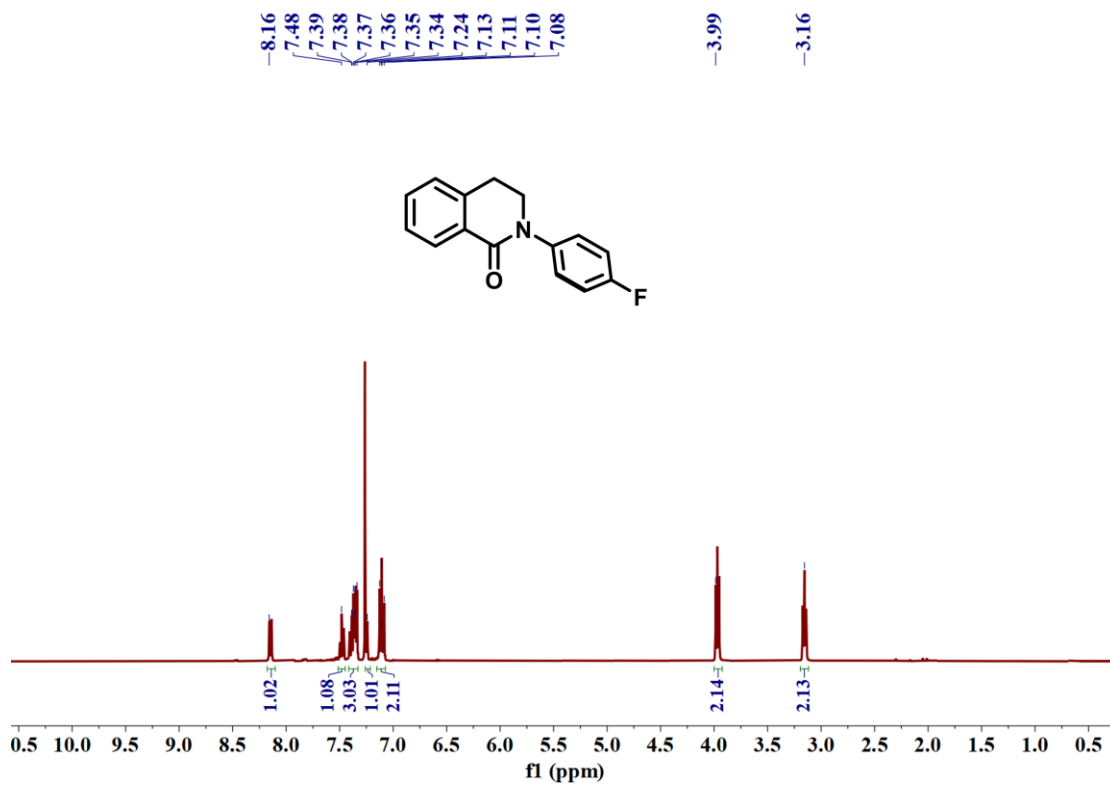

Fig. S21 <sup>1</sup>H NMR spectra of **2d** in CDCl<sub>3</sub>.

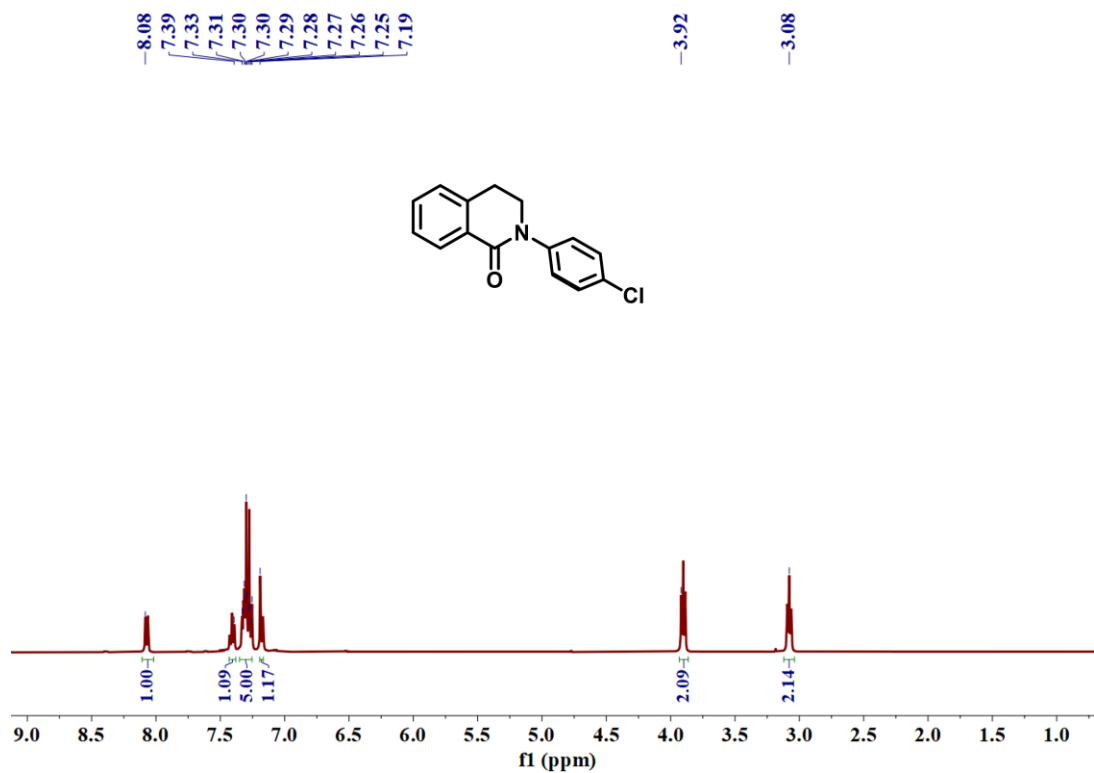

Fig. S22 <sup>1</sup>H NMR spectra of **2e** in CDCl<sub>3</sub>.

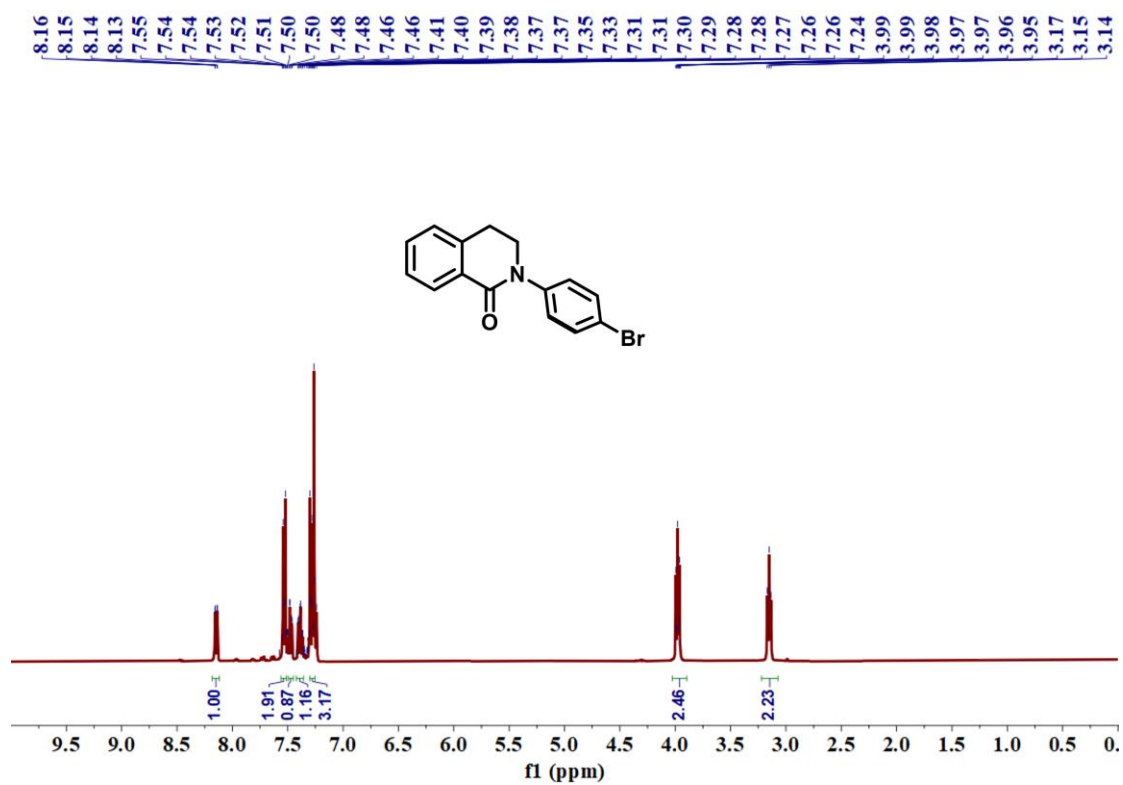

Fig. S23 <sup>1</sup>H NMR spectra of **2f** in CDCl<sub>3</sub>.

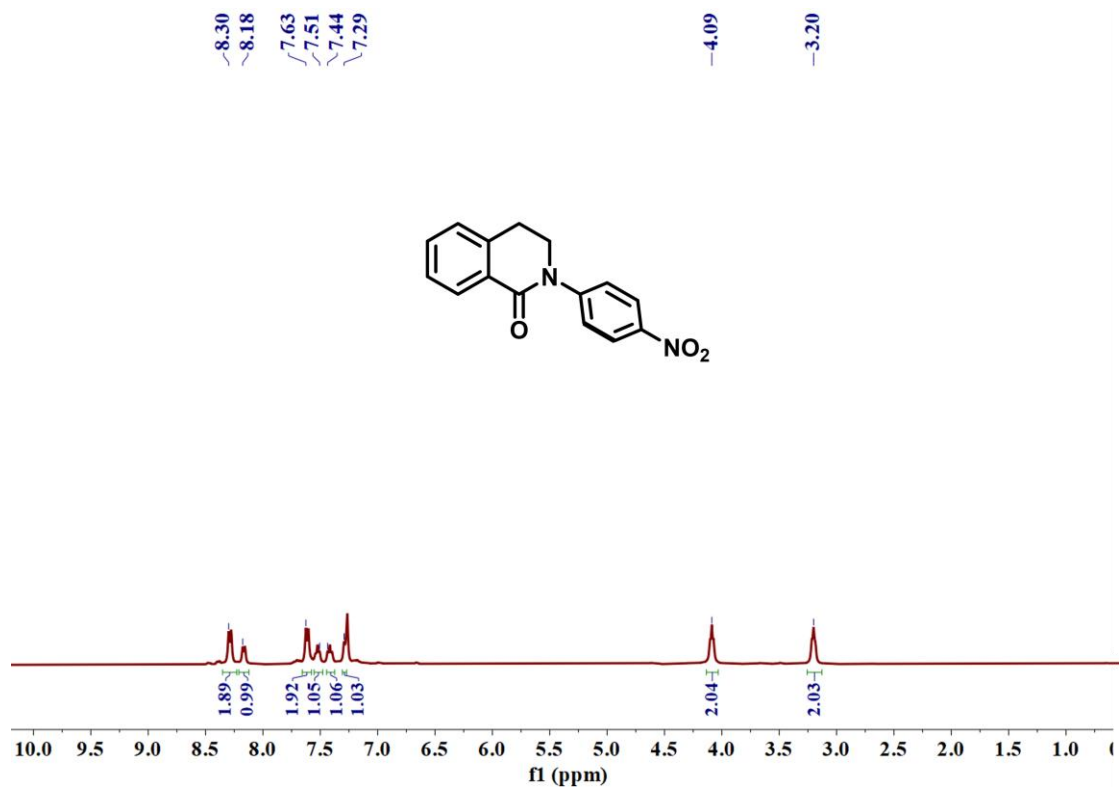

Fig. S24 <sup>1</sup>H NMR spectra of **2g** in CDCl<sub>3</sub>.

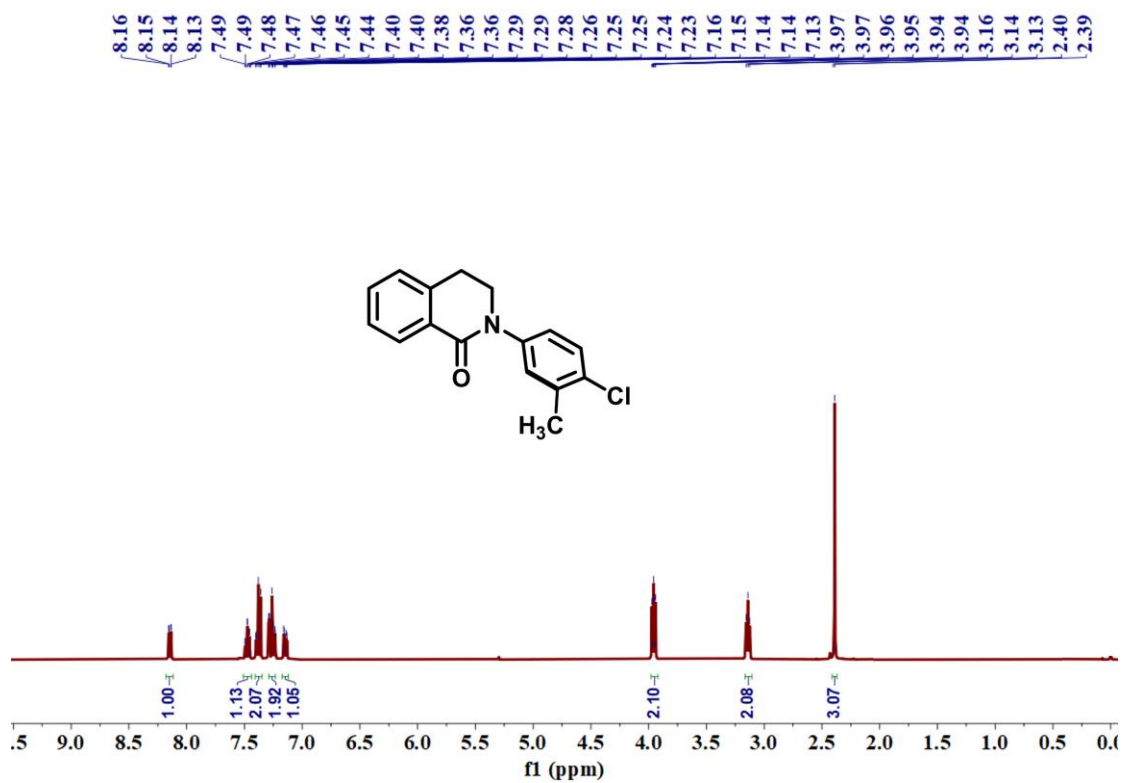

Fig. S25 <sup>1</sup>H NMR spectra of **2h** in CDCl<sub>3</sub>.

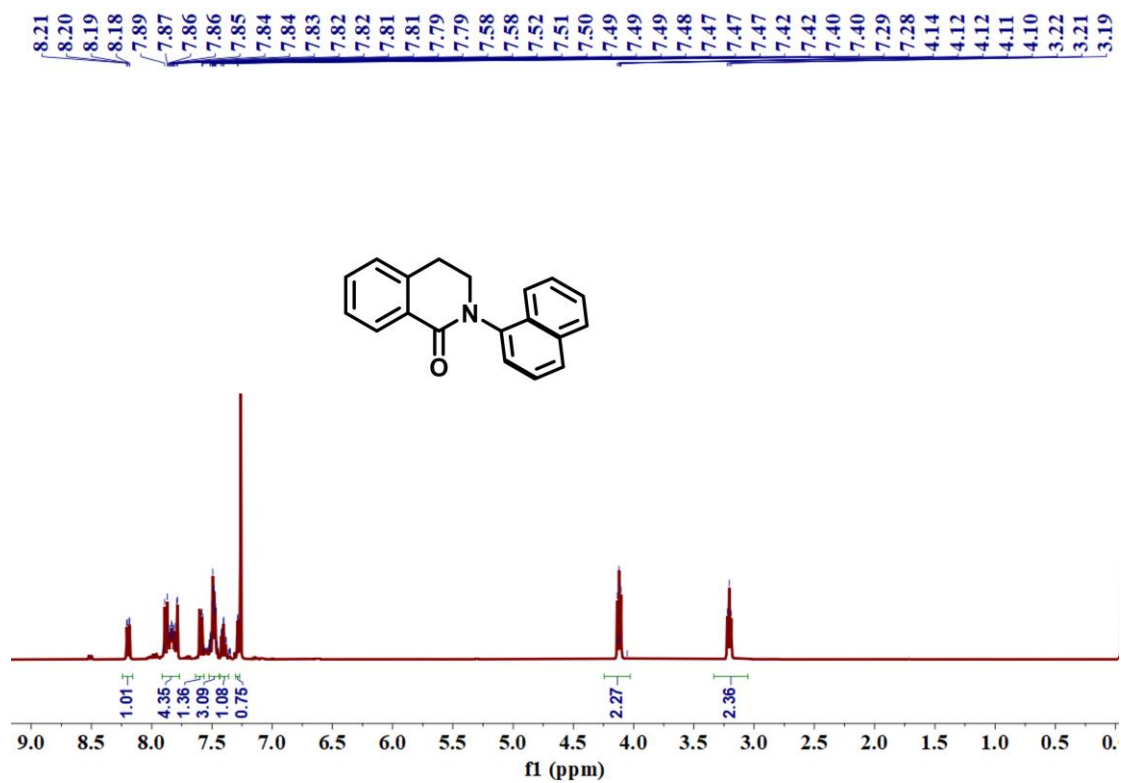

Fig. S26  $^1\text{H}$  NMR spectra of **2i** in CDCl<sub>3</sub>.

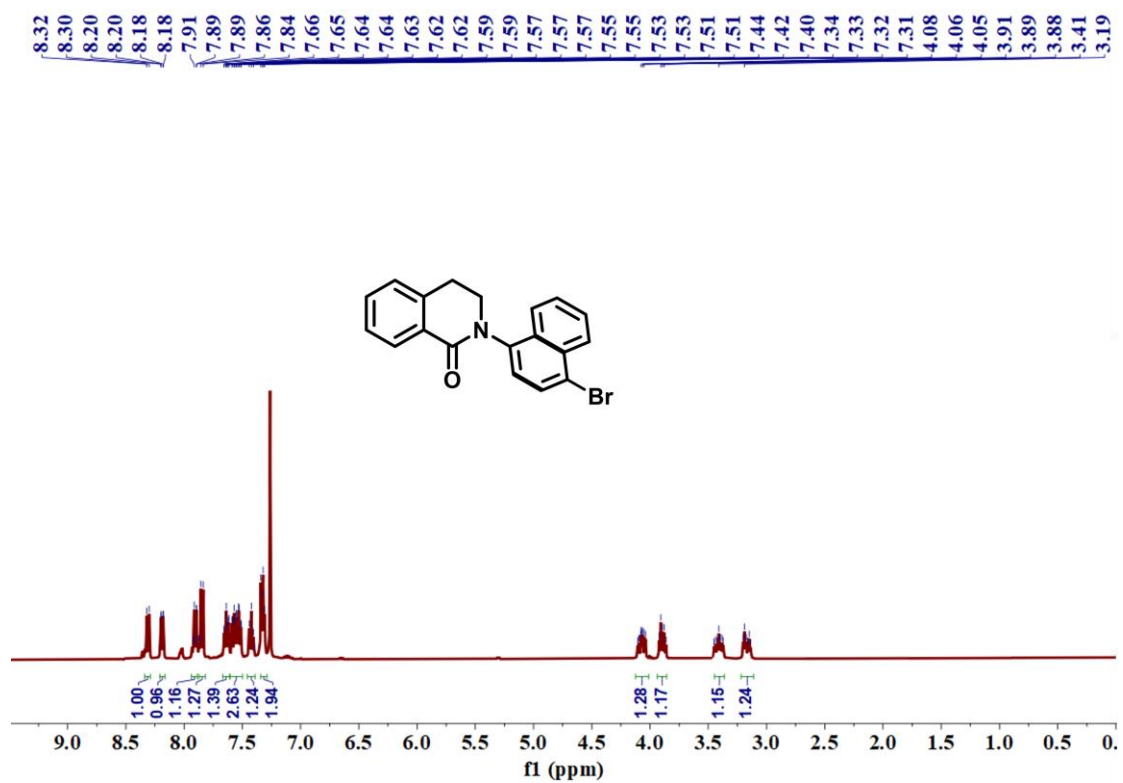

Fig. S27 <sup>1</sup>H NMR spectra of **2j** in CDCl<sub>3</sub>.

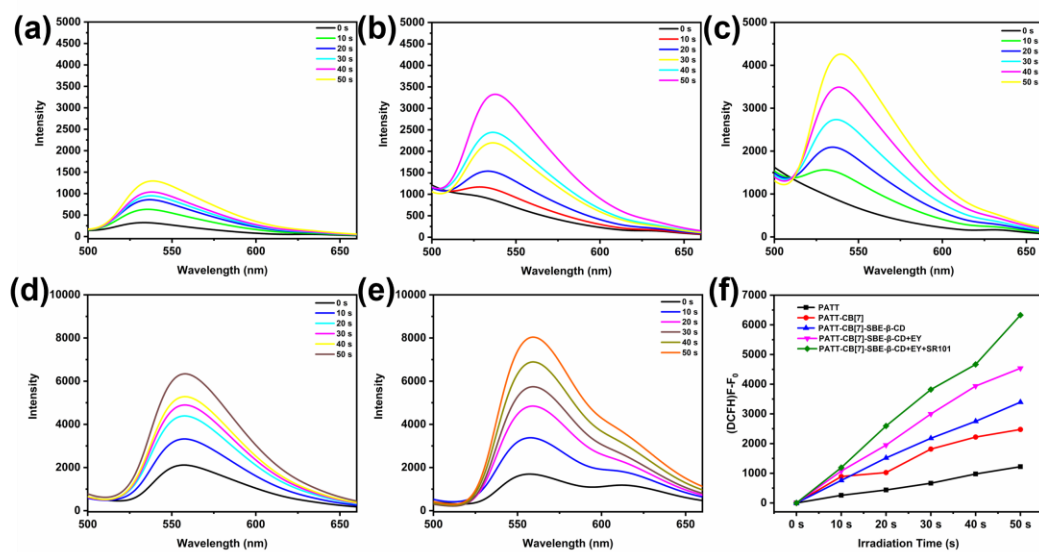

**Fig. S28** The fluorescence spectra of DCFH (20 μM) after irradiation (360-365 nm) for different time in the presence of (a) PATT, (b) PATT-CB[7], (c) PATT-CB[7]-SBE-β-CD, (d) PATT-CB[7]-SBE-β-CD+EY, (e) PATT-CB[7]-SBE-β-CD+EY+SR101; (f) Plots of  $\Delta F(F-F_0)$  of DCFH at fluorescence emission maxima upon light irradiation (365 nm) for different time intervals in the presence of PATT, PATT-CB[7], PATT-CB[7]-SBE-β-CD, PATT-CB[7]-SBE-β-CD+EY, PATT-CB[7]-SBE-β-CD+EY+SR101.



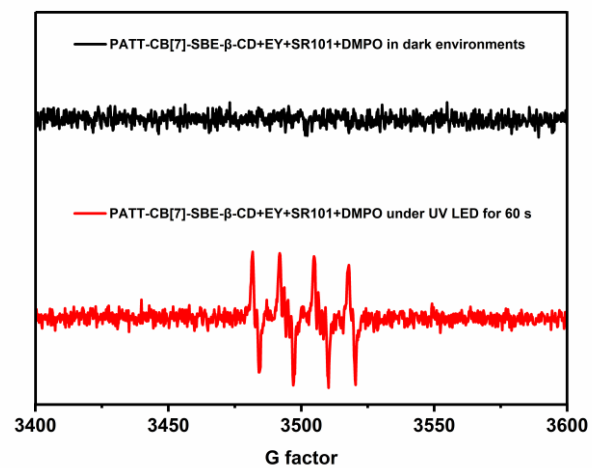

**Fig. S29** EPR spectra of  $O_2^{\bullet-}$  captured with DMPO as the trapping agent.

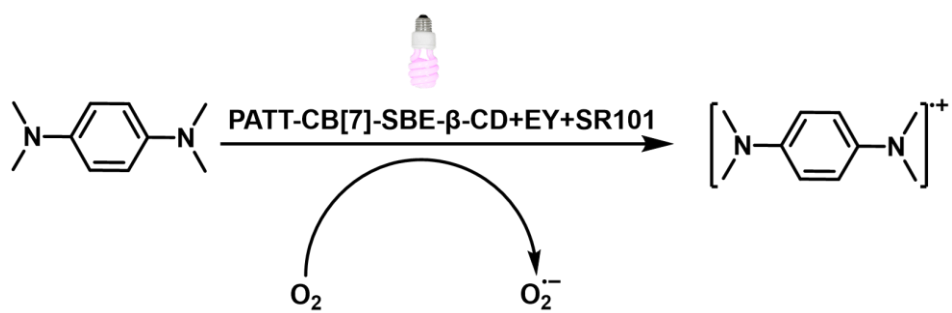

**Fig. S30** The mechanism of TMPD as the  $O_2^{\bullet -}$  indicator.

**Table S1** photooxidative coupling reaction of benzylamine.<sup>a,b</sup>

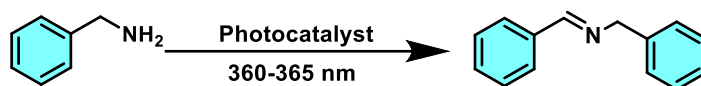

| Entry | Variation from standard conditions <sup>a</sup> | Yield <sup>b</sup> [%] |
|-------|-------------------------------------------------|------------------------|
| 1     | Standard condition                              | 87                     |
| 2     | PATT-CB[7]                                      | 38                     |
| 3     | PATT-CB[7]-SBE-β-CD                             | 46                     |
| 4     | PATT-CB[7]-SBE-β-CD+EY                          | 63                     |

<sup>a</sup>Standard conditions: benzylamine (0.2 mmol), PATT-CB[7]-SBE-β-CD+EY+SR101 (1 mol%), H<sub>2</sub>O (2.0 mL), DIPEA (0.5 mmol), 360-365 nm LED, room temperature, 24 h; <sup>b</sup>Isolated yield.

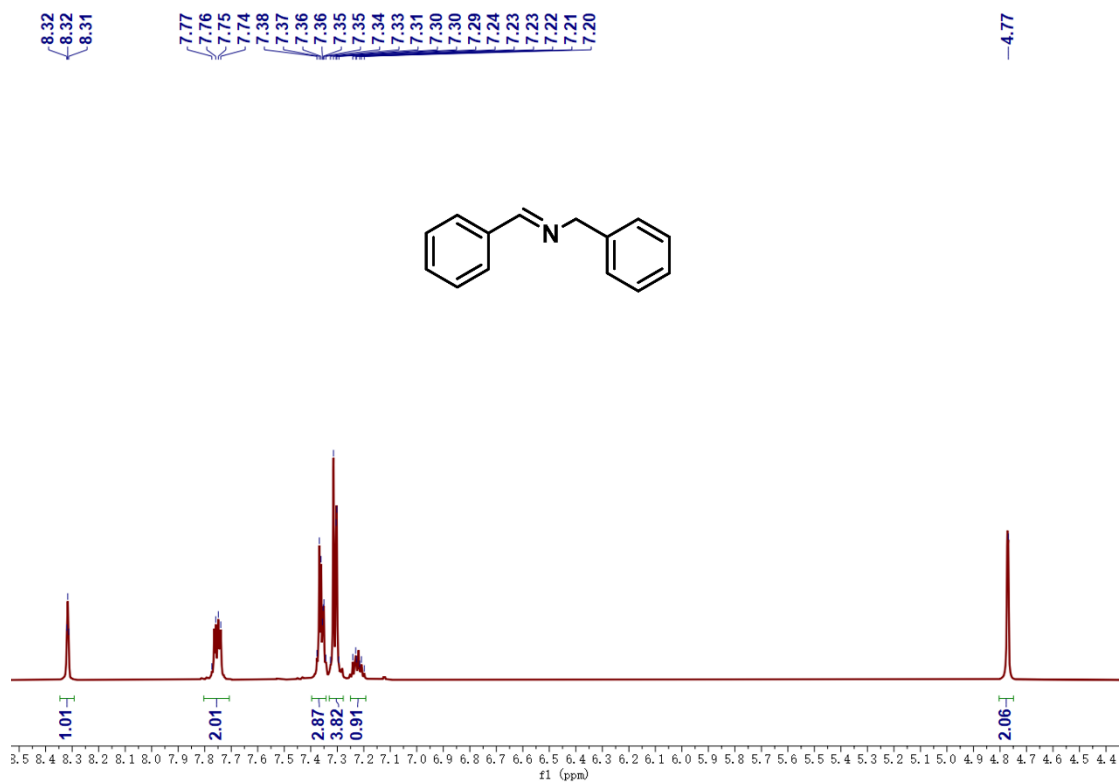

Fig. S31 <sup>1</sup>H NMR spectra of *N*-benzyl-1-phenylmethanimine in CDCl<sub>3</sub>.

**<sup>1</sup>H NMR data of 2a-2j**

**2a. 2-Phenyl-3,4-dihydroisoquinolin-1(2H)-one**

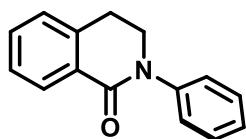

<sup>1</sup>H NMR (400 MHz, CDCl<sub>3</sub>) δ 8.15 (d, *J* = 7.7 Hz, 1H), 7.48-7.44 (t, *J* = 7.5 Hz, 1H), 7.37-7.33 (t, *J* = 7.6 Hz, 1H), 7.28-7.23 (q, *J* = 8.3 Hz, 6H), 3.97 (t, *J* = 6.4 Hz, 2H), 3.14 (t, *J* = 6.5 Hz, 2H).

**2b. 2-(p-tolyl)-1,2,3,4-tetrahydroisoquinoline**

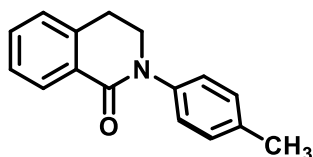

<sup>1</sup>H NMR (400 MHz, CDCl<sub>3</sub>) δ 8.16 (dd, *J* = 7.8, 1.4 Hz, 1H), 7.44 (m, *J* = 7.5, 1.5 Hz, 1H), 7.39 (m, *J* = 7.6, 1.3 Hz, 1H), 7.30-7.20 (m, 6H), 3.98-3.95 (m, 2H), 3.12 (t, *J* = 6.4 Hz, 2H), 2.42 (s, 3H).

**2c. 2-(4-methoxyphenyl)-3,4-dihydroisoquinolin-1(2H)-one**

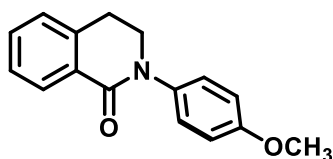

<sup>1</sup>H NMR (400 MHz, CDCl<sub>3</sub>) δ 8.16 (dd, *J* = 7.7, 1.4 Hz, 1H), 7.46 (d, *J* = 1.5 Hz, 1H), 7.37 (d, *J* = 1.2 Hz, 1H), 7.31-7.29 (m, 2H), 7.26-7.23 (m, 1H), 6.95-6.93 (m, 2H), 3.95-3.93 (dd, *J* = 7.0, 6.1 Hz, 2H), 3.86-3.83 (s, 3H), 3.15 (t, *J* = 6.5 Hz, 2H).

**2d. 2-(4-fluorophenyl)-3,4-dihydroisoquinolin-1(2H)-one**

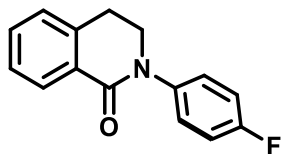

<sup>1</sup>H NMR (400 MHz, CDCl<sub>3</sub>) δ 8.16 (d, *J* = 1.6 Hz, 1H), 7.47 (d, *J* = 7.5 Hz, 1H), 7.41-7.33 (m, 3H), 7.24 (s, 1H), 7.15-7.07 (m, 2H), 3.98 (d, *J* = 6.2 Hz, 2H), 3.16 (d, *J* = 6.4 Hz, 2H).

**2e. 2-(4-chlorophenyl)-3,4-dihydroisoquinolin-1(2H)-one**

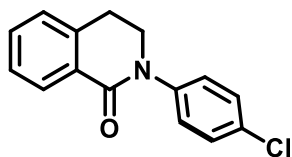

$^1\text{H}$  NMR (400 MHz,  $\text{CDCl}_3$ )  $\delta$  8.08 (d,  $J = 1.6$  Hz, 1H), 7.41 (d,  $J = 7.5$  Hz, 1H), 7.33-7.28 (m, 5H), 7.27-7.19 (m, 1H), 3.92 (d,  $J = 6.2$  Hz, 2H), 3.08 (d,  $J = 6.4$  Hz, 2H).

**2f. 2-(4-bromonaphthalen)-3,4-dihydroisoquinolin-1(2H)-one**

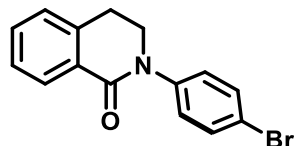

$^1\text{H}$  NMR (400 MHz,  $\text{CDCl}_3$ )  $\delta$  8.15 (dd,  $J = 7.8, 1.5$  Hz, 1H), 7.60-7.24 (m, 9H), 4.02-3.93 (m, 2H), 3.15 (t,  $J = 6.4$  Hz, 2H).

**2g. 2-(p-nitrobenzene)-1,2,3,4-tetrahydroisoquinoline**

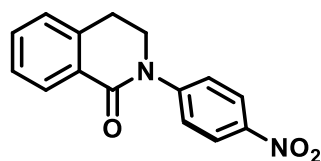

$^1\text{H}$  NMR (400 MHz,  $\text{CDCl}_3$ )  $\delta$  8.30 (d,  $J = 8.6$  Hz, 2H), 8.18 (d,  $J = 7.8$  Hz, 1H), 7.63 (d,  $J = 8.7$  Hz, 2H), 7.51 (t,  $J = 7.5$  Hz, 1H), 7.44 (t,  $J = 7.8$  Hz, 1H), 7.29 (d,  $J = 7.2$  Hz, 1H), 4.09 (t,  $J = 6.4$  Hz, 2H), 3.20 (t,  $J = 6.4$  Hz, 2H).

**2h. 2-(4-chloro-3-methylphenyl)-3,4-dihydroisoquinolin-1(2H)-one**

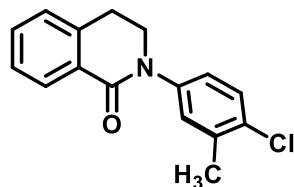

$^1\text{H}$  NMR (400 MHz,  $\text{CDCl}_3$ )  $\delta$  8.14 (dd,  $J = 7.7, 1.4$  Hz, 1H), 7.47 (td,  $J = 7.5, 1.5$  Hz, 1H), 7.43-7.17 (m, 5H), 7.15 (dd,  $J = 8.5, 2.6$  Hz, 1H), 3.96 (dd,  $J = 7.0, 6.0$  Hz, 2H), 3.14 (t,  $J = 6.4$  Hz, 2H), 2.39 (s, 3H).

**2i. 2-(naphthalen-1-yl)-3,4-dihydroisoquinolin-1(2H)-one**

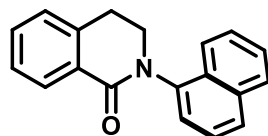

$^1\text{H}$  NMR (400 MHz,  $\text{CDCl}_3$ )  $\delta$  8.19 (dd,  $J = 7.7, 1.5$  Hz, 1H), 7.91-7.77 (m, 4H), 7.58 (d,  $J = 2.2$  Hz, 1H), 7.52-7.44 (m, 3H), 7.40 (td,  $J = 7.6, 1.3$  Hz, 1H), 7.29 (t,  $J = 1.6$  Hz, 1H), 4.12 (dd,  $J = 7.0, 6.0$  Hz, 2H), 3.21 (t,  $J = 6.4$  Hz, 2H).

**2j. 2-(4-bromonaphthalen-1-yl)-3,4-dihydroisoquinolin-1(2H)-one**

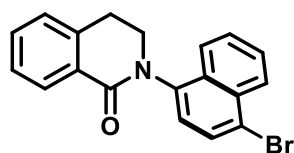

$^1\text{H NMR}$  (400 MHz,  $\text{CDCl}_3$ )  $\delta$  8.31 (d,  $J = 8.4$  Hz, 1H), 8.19 (dd,  $J = 7.7, 1.5$  Hz, 1H), 7.95-7.81 (m, 2H), 7.75-7.49 (m, 3H), 7.47-7.28 (m, 3H), 4.07 (ddd,  $J = 12.3, 10.4, 4.6$  Hz, 1H), 3.89 (dt,  $J = 11.9, 5.5$  Hz, 1H), 3.41 (ddd,  $J = 15.8, 10.4, 5.2$  Hz, 1H), 3.17 (dt,  $J = 15.9, 5.2$  Hz, 1H).

***N*-benzyl-1-phenylmethanimine**

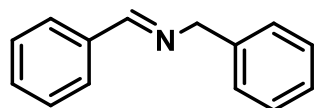

$^1\text{H NMR}$  (400 MHz,  $\text{CDCl}_3$ )  $\delta$  8.32-8.31 (t,  $J = 1.5$  Hz, 1H), 7.77-7.74 (m, 2H), 7.38-7.34 (m, 3H), 7.33-7.29 (m, 4H), 7.24-7.20 (m, 1H), 4.77 (s, 2H).
